# Supplementary material for: Use of Ambroxol as Therapy for Gaucher Disease
Source: PubMed Central journal article supplement (PMC10285580; doi:10.1001/jamanetworkopen.2023.19364), 2023-06-21
Supplement: jamanetwopen-e2319364-s001.pdf [file jamanetwopen-e2319364-s001.pdf]

## Supplementary Online Content

Zhan X, Zhang H, Maegawa GHB, et al. Use of ambroxol as therapy for Gaucher disease. *JAMA Netw Open*. 2023;6(6):e2319364.

doi:10.1001/jamanetworkopen.2023.19364

**eFigure 1.** Flow Diagram of Participant Recruitment and Retention

**eTable.** Detailed Data of the 32 Patients Included in the Study

**eFigure 2.** White Blood Cell Count During Ambroxol Therapy

This supplementary material has been provided by the authors to give readers additional information about their work.

**eFigure 1.** Flow Diagram of Participant Recruitment and Retention

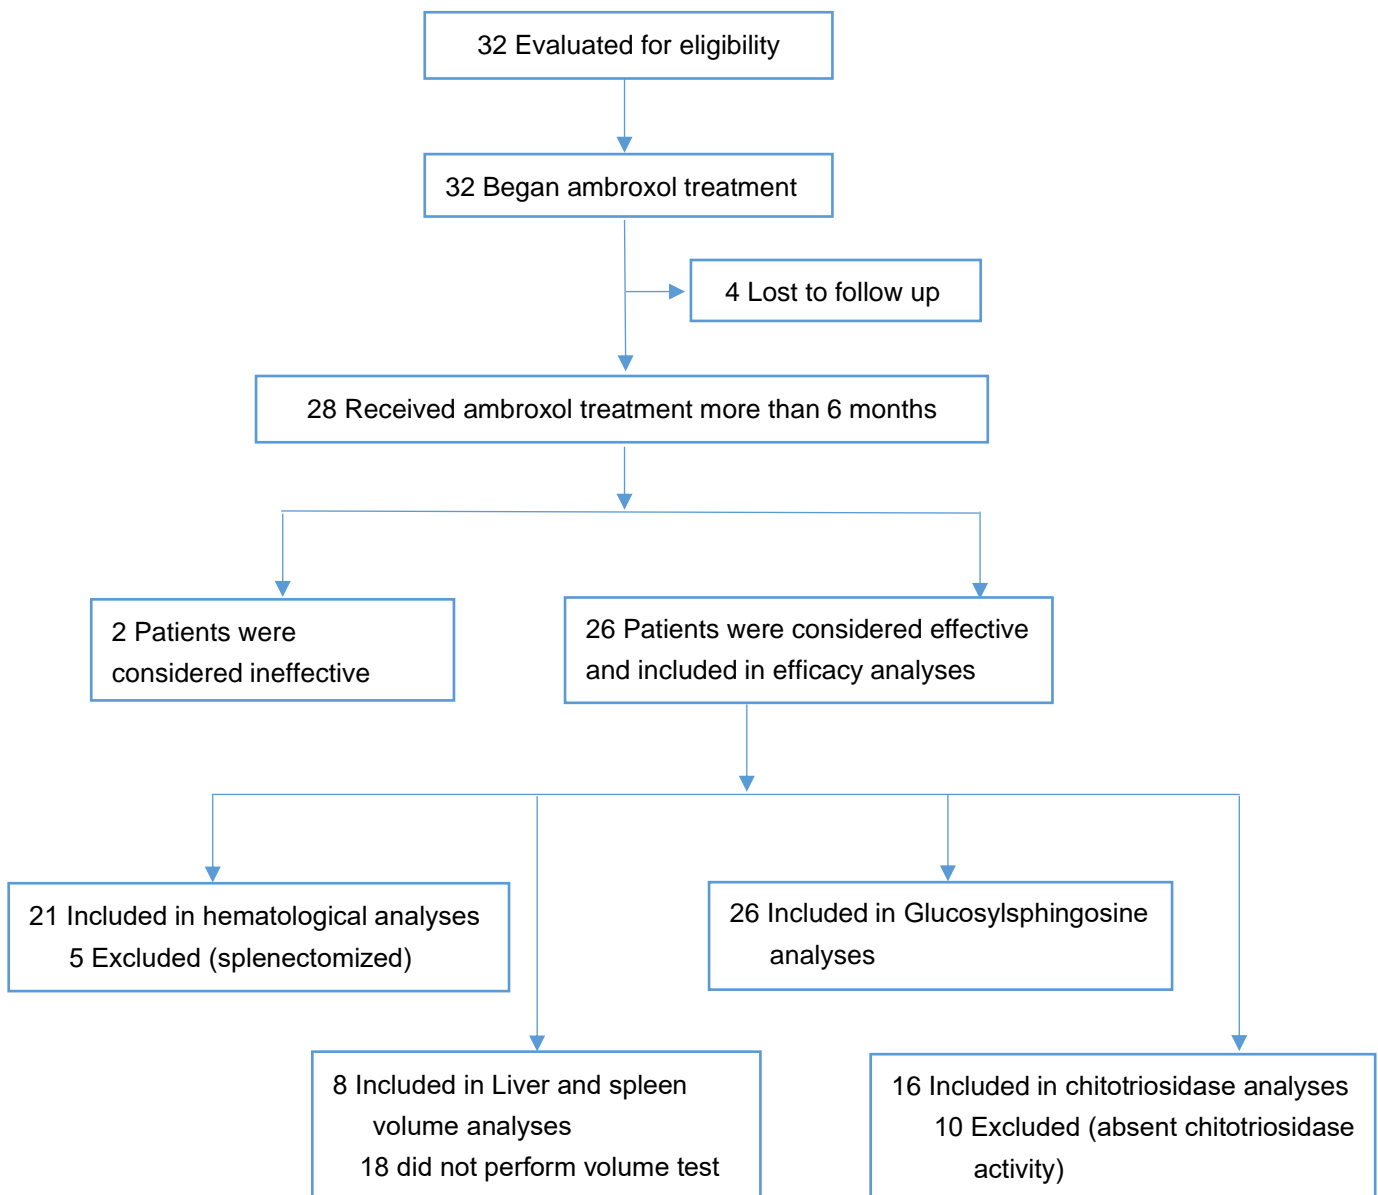

Twenty-one patients were included in hematological analysis, excluding five splenectomized patients. Sixteen patients were included in chitotriosidase analysis, excluding 10 patients with absent chitotriosidase activity. Liver and spleen volume analysis of pre- and post-treatment was available for 8 patients.

**eTable.** Detailed Data of the 32 Patients Included in the Study

| Case | Sex | Type | Clinical feature             | Age at start of ambroxol (years) | Duration months | Dose (mg/Kg.day) | Adverse effects | Evidence of efficacy                                                                                                                                       |
|------|-----|------|------------------------------|----------------------------------|-----------------|------------------|-----------------|------------------------------------------------------------------------------------------------------------------------------------------------------------|
| 1    | F   | GD1  | Severe HS, A, T, B           | 6                                | 70              | 16.8             | -               | Decrease of plasma lyso-Gb1 and CHIT activity, liver and spleen volume decrease, excellent academic performance.                                           |
| 2    | M   | GD1  | Severe HS, severe T          | 29                               | 60              | 14.5             | -               | Decrease of plasma plasma lyso-Gb1 and CHIT activity, hematological improvement.                                                                           |
| 3    | M   | GD1  | Hepatomegaly, splenectomized | 46                               | 54              | 15.2             | -               | Decrease of plasma lyso-Gb1 and CHIT activity                                                                                                              |
| 4    | M   | GD1  | Severe HS, severe T          | 47                               | 52              | 6.4              | -               | Decrease of plasma lyso-Gb1 and CHIT activity, respond well and continuously.                                                                              |
| 5    | M   | GD1  | Severe HS, A, B              | 2.5                              | 39              | 13.5             | -               | Decrease of plasma CHIT activity, increased height, reduced severity and frequency of bone pain, no progressive enlargement of the liver and spleen.       |
| 6    | F   | GD1  | Severe HS, severe A, T       | 23                               | 74              | 13.7             | -               | Hematological improvement, decrease of plasma lyso-Gb1, increased physical activity without fatigue, no bleeding when brushing teeth, normal menstruation. |
| 7    | M   | GD1  | Severe HS, T                 | 10                               | 8               | 18.8             | -               | Decrease of plasma lyso-Gb1 and CHIT activity, reduced frequency of nose bleeding.                                                                         |
| 8    | M   | GD1  | Severe HS, A, T              | 5                                | 66              | 9                | -               | Decrease of plasma lyso-Gb1, CHIT activity, and liver and spleen volume, hematological improvement, and reduced frequency of bone pain and nose bleeding.  |

| Case | Sex | Type | Clinical feature                 | Age at start of ambroxol (years) | Duration months | Dose (mg/Kg.day) | Adverse effects | Evidence of efficacy                                                                                               |
|------|-----|------|----------------------------------|----------------------------------|-----------------|------------------|-----------------|--------------------------------------------------------------------------------------------------------------------|
| 9    | M   | GD1  | Severe HS, A, severe T           | 11                               | 10              | 9.6              | -               | Decrease of plasma lyso-Gb1, hematological improvement, normal physical activity without fatigue, no bone pain.    |
| 10   | F   | GD1  | Severe HS, B, severe A, severe T | 32                               | 24              | 8.7              | -               | hematological improvement, normal menstruation.                                                                    |
| 11   | F   | GD1  | Severe HS, severe A, severe T    | 2                                | 19              | 20               | -               | No effect <sup>a</sup>                                                                                             |
| 12   | F   | GD1  | Severe HS, severe A, T           | 7                                | 6               | 10               | -               | Hematological improvement, decrease of liver and spleen volume.                                                    |
| 13   | F   | GD1  | Hepatomegaly, splenectomized     | 30                               | 24              | 12.8             | -               | Decrease of liver volume, improved menstruation.                                                                   |
| 14   | M   | GD1  | HS, A, T                         | 5                                | 50              | 20               | -               | Decrease of plasma lyso-Gb1 and CHIT activity, liver volume and spleen volume decrease, hematological improvement. |
| 15   | F   | GD1  | Severe HS, A, T                  | 4.5                              | 12              | 16.9             | -               | Decrease of plasma lyso-Gb1 and CHIT activity, hemoglobin increase.                                                |
| 16   | F   | GD1  | Severe HS, T                     | 27                               | 12              | 5.4              | Nausea          | petechia disappear.                                                                                                |
| 17   | F   | GD1  | Severe HS, A, Severe T           | 30                               | 24              | 6.5              | -               | Decrease of plasma CHIT activity, petechia and swelling of both lower limbs subsided .                             |

| Case | Sex | Type | Clinical feature                                  | Age at start of ambroxol (years) | Duration months | Dose (mg/Kg.day) | Adverse effects     | Evidence of efficacy                                                                                                                                                |
|------|-----|------|---------------------------------------------------|----------------------------------|-----------------|------------------|---------------------|---------------------------------------------------------------------------------------------------------------------------------------------------------------------|
| 18   | M   | GD1  | Hepatomegaly, B, T, splenectomized                | 33                               | 19              | 12               | -                   | Decrease of DBS lyso-Gb1 and CHIT activity, hematological improvement, increased physical capacity.                                                                 |
| 19   | M   | GD1  | Severe HS, severe A, T                            | 6                                | 27              | 15               | Diarrhea, skin rash | Decrease of plasma lyso-Gb1 and CHIT activity, and liver and spleen volume, hematological improvement.                                                              |
| 20   | F   | GD1  | Severe HS, Severe T                               | 2                                | 50              | 13.5             | -                   | Decrease of plasma lyso-Gb1 and CHIT activity, and liver and spleen volume, hematological improvement.                                                              |
| 21   | F   | GD1  | Hepatomegaly, Severe splenomegaly, A, T, B        | 7                                | 39              | 10.7             | -                   | Decrease in plasma lyso-Gb1 levels and CHIT activity, liver and spleen volume decrease, hematological improvement, reduced frequency of bone pain, catch-up growth. |
| 22   | M   | GD1  | Severe HS, A, T                                   | 4                                | 8               | 11.1             | -                   | Reduced frequency of nose bleeding, decrease of plasma CHIT activity.                                                                                               |
| 23   | M   | GD1  | HS, T                                             | 8                                | 8               | 9.2              | -                   | Decrease in plasma lyso-Gb1.                                                                                                                                        |
| 24   | M   | GD1  | B, splenectomized                                 | 24                               | 19              | 5.8              | -                   | Decrease in plasma lyso-Gb1.                                                                                                                                        |
| 25   | M   | GD3  | Hepatomegaly, Severe splenomegaly, severe T, E, O | 11                               | 32              | 15.5             | -                   | Decrease in plasma lyso-Gb1, hematological improvement, neurological improvement <sup>b</sup> .                                                                     |

| Case | Sex | Type   | Clinical feature                                 | Age at start of ambroxol (years) | Duration months | Dose (mg/Kg.day) | Adverse effects | Evidence of efficacy                                                                                                                    |
|------|-----|--------|--------------------------------------------------|----------------------------------|-----------------|------------------|-----------------|-----------------------------------------------------------------------------------------------------------------------------------------|
| 26   | F   | GD3    | Severe HS, A, severe T, E, O                     | 7                                | 28              | 13.5             | -               | Decrease of plasma lyso-Gb1, hematological improvement, reduced frequency of nose bleeding, and increased physical activity capability. |
| 27   | F   | GD1    | B, splenectomized                                | 53                               | 23              | 11.7             | -               | Decrease plasma in lyso-Gb1.                                                                                                            |
| 28   | M   | GD 2-3 | Severe HS, T, O, strabismus, growth retardation  | 3                                | 30              | 15.3             | salivation      | No effect <sup>c</sup>                                                                                                                  |
| 29   | F   | GD1    | Severe splenomegaly, severe T, lost to follow-up | 57                               | Not available   | 10               | Not available   | Not available                                                                                                                           |
| 30   | F   | GD1    | HS, severe A, lost to follow-up                  | 2                                | Not available   | 15               | Not available   | Not available                                                                                                                           |
| 31   | F   | GD1    | HS, A, T, lost to follow-up                      | 2                                | Not available   | 15               | Not available   | Not available                                                                                                                           |
| 32   | F   | GD1    | Severe HS, A, severe T                           | 13                               | Not available   | 14.4             | Not available   | Not available                                                                                                                           |

F, female; M, Male; GD 1, type 1 Gaucher Disease; GD 3, type 3 Gaucher Disease; GD 2-3, intermediate type 2-3; HS, hepatosplenomegaly; A, anemia; T, thrombocytopenia; B, bone involvement; E, abnormal EEG; O: ophthalmoplegia; CHIT: chitotriosidase; lyso-Gb1: glucosylsphingosine; DBS: dried blood spot; severe thrombocytopenia:  $<60 \times 10^9/L$ ; severe anemia:  $<9 \text{ g/dL}$ .

- : No adverse effects were described by the patients.

Expanded information on efficacy by patient number:

<sup>a</sup> Case 11: Massive splenomegaly (spleen volume 41 MN at baseline), poor hematologic parameters, increased lyso-Gb1 levels, enlarged abdomen.

<sup>b</sup> Case 25: Improved horizontal eye movement, improved head control when looking left and right.

<sup>c</sup> Case 28: Massive splenomegaly (spleen volume 87 MN at baseline), poor hematologic parameters, increased lyso-Gb1 levels, horizontal gaze palsy.

The height grew slowly in the past year. No improvement in speech and gait.
