# Supplementary material for: Use of Ambroxol as Therapy for Gaucher Disease
Source: PubMed Central journal article supplement (PMC10285580; doi:10.1001/jamanetworkopen.2023.19364), 2023-06-21
Supplement: jamanetwopen-e2319364-s002.pdf [file jamanetwopen-e2319364-s002.pdf]

## Data Sharing Statement

Zhan. Use of Ambroxol as Therapy for Gaucher Disease. *JAMA Netw Open*. Published June 21, 2023. doi:10.1001/jamanetworkopen.2023.19364

### Data

**Data available:** No

### Additional Information

**Explanation for why data not available:** The datasets generated and/or analysed during the current study are available from the corresponding author on reasonable request
